# Supplementary material
Source: publisher figshare collection journal article supplement (https://springernature.figshare.com/ndownloader/files/13754978)

Supplementary Table 1 *agr* frameshifts

| Gene | TCH1516<br>locus_tag  | Mutation          | Sample_IDs | Patient/<br>samples                     |
|------|-----------------------|-------------------|------------|-----------------------------------------|
| agrC | USA300HOU_R<br>S10970 | 2149206 GAA>GA    | 26         | Patient 26: III                         |
| agrC | USA300HOU_R<br>S10970 | 2149482<br>AGG>AG | 76         | Patient 26:<br>throat1                  |
| agrA | USA300HOU_R<br>S10975 | 2150087<br>ATG>AG | 41,87,88   | Patient 11:<br>peri1, nose2,<br>throat2 |

Supplementary Figure 1. Provenance of strains sequenced in the study.

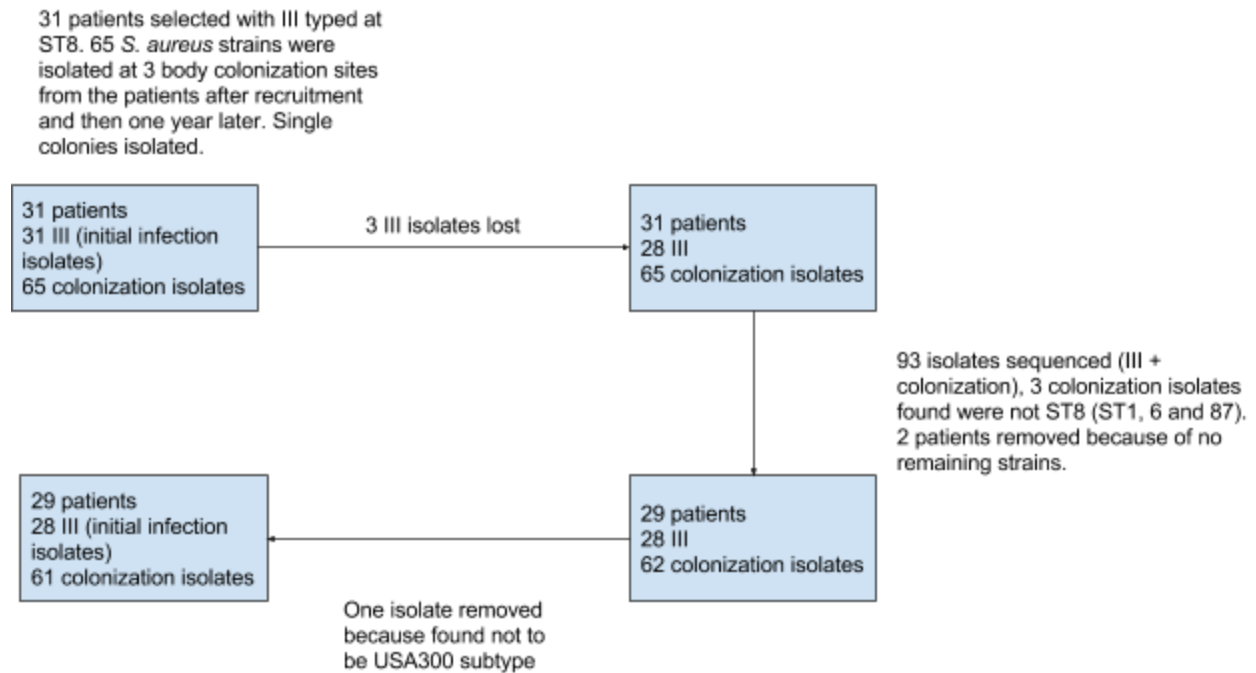

Supplementary Figure 2. USA300 ISL strains isolated from each body site

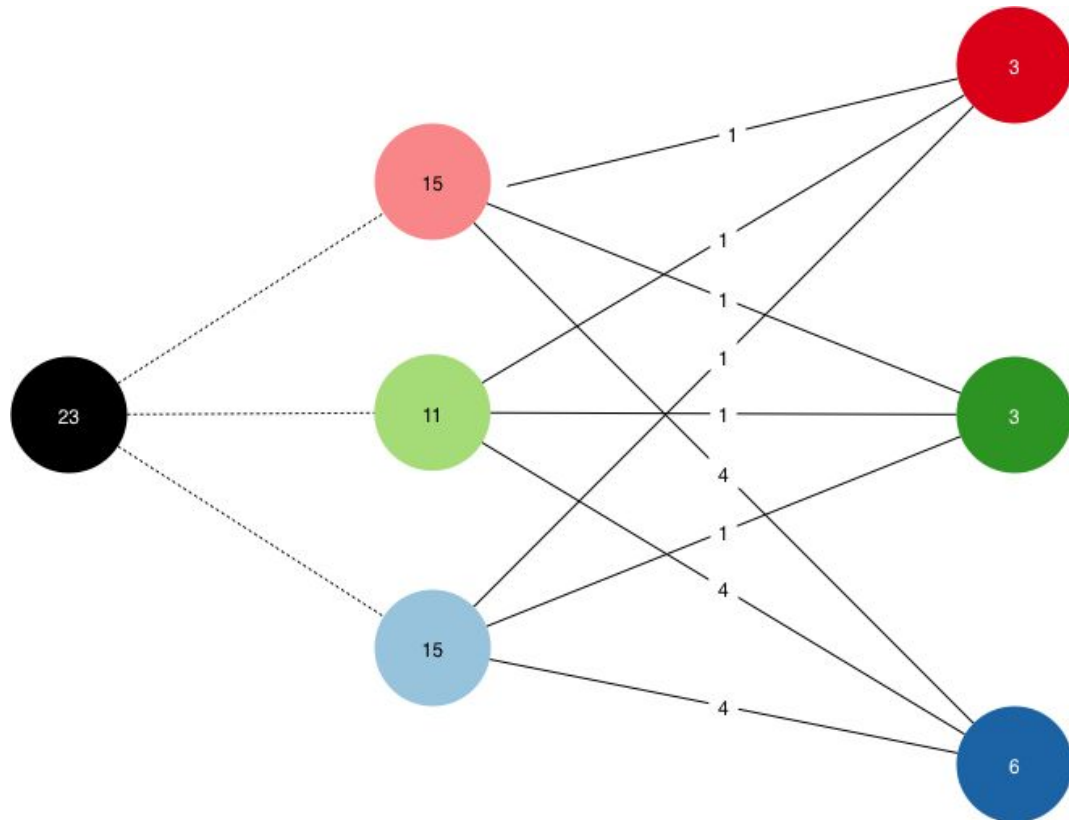

This figure uses the same color scheme as Figure 1 and S5, S6. Blue = nose, Green = Throat, Red = perirectal, black = III. Light colors are time 1, darker are time 2. Number in circle are the numbers of ISLs with each type. Connectors (not dashed) are the number of times an ISL contained both strain types.

Supplementary Figure 3. SNP frequency by genome

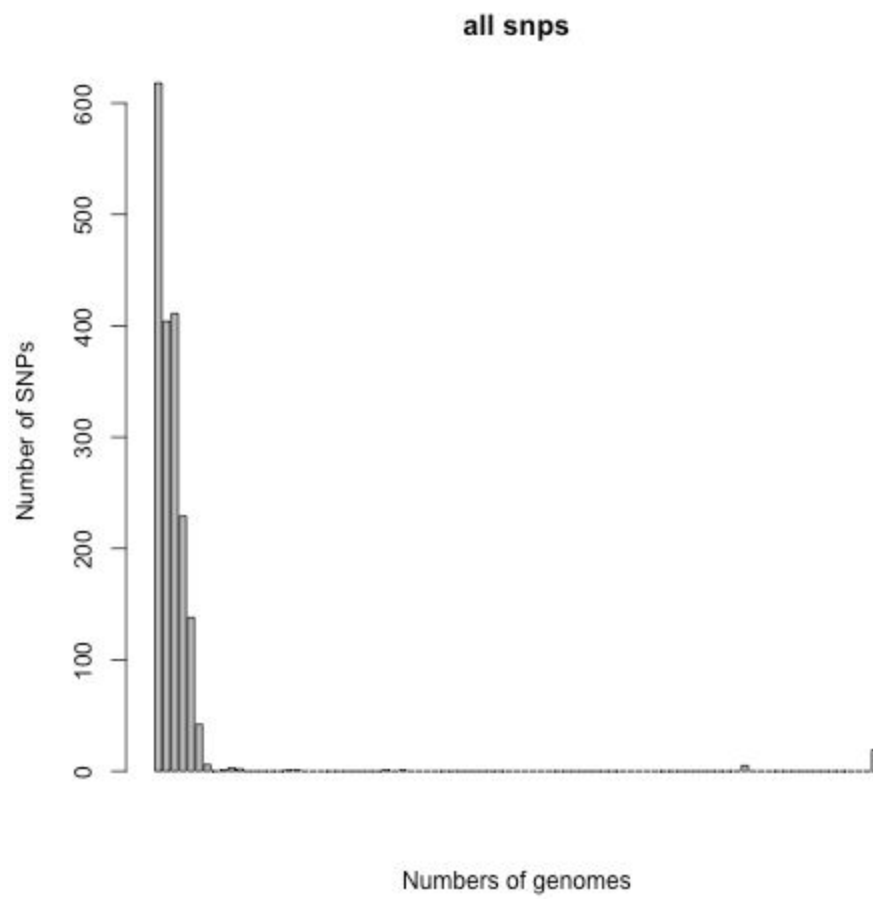

#### Supplementary Figure 4. Within ISL estimates for Pangenome

Using on FindMyFriends software (<https://github.com/thomasp85/FindMyFriends>). we estimated the total pangenome size to be 4,361 gene groups with a core of about 2,000 (Fig S2A). The total pangenome size is almost certainly inflated because of overcalling on the assembled from shotgun Illumina sequencing. Fig S2B. Strains with the same ISL were more similar to each other in terms of gene content than those in different patients/ISLs (median of 25 within-ISL compare to 120 between - figure below). Due to variability in plasmids and prophage regions we found as 500+ gene content changes between strains from the same recently infecting lineage.

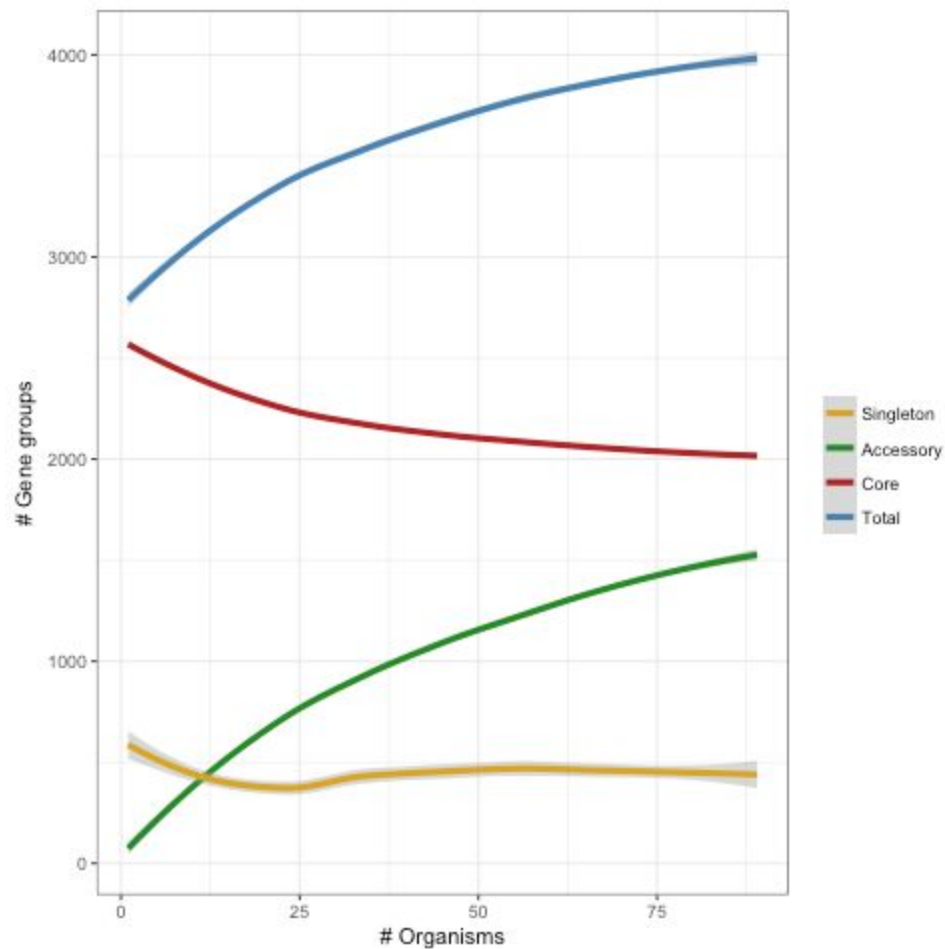

S4A

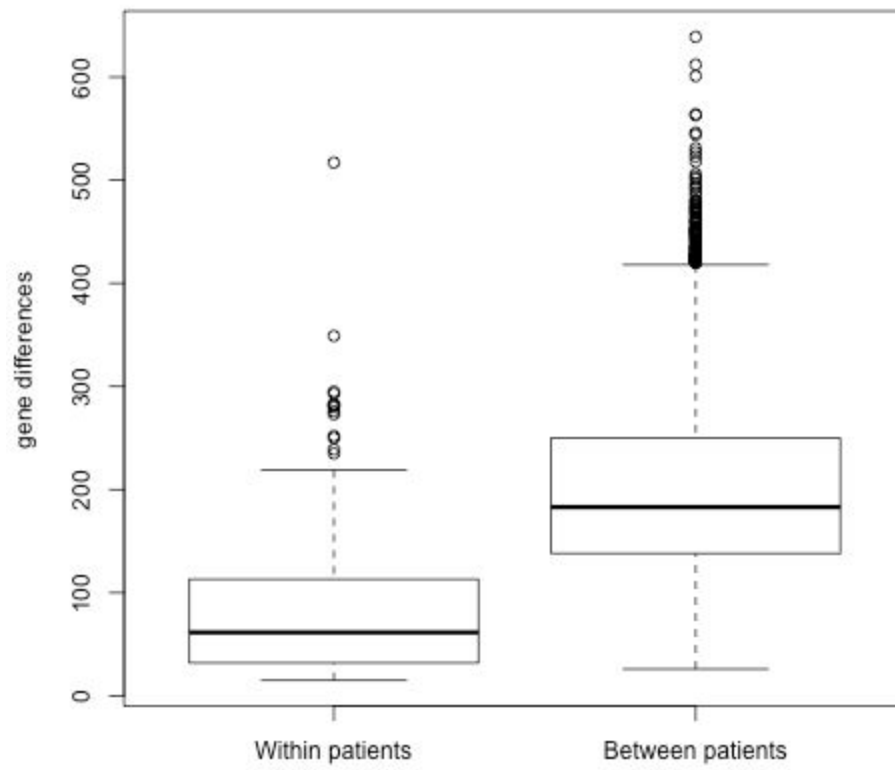

S4B

Supplementary Figure 5. Plasmid distribution

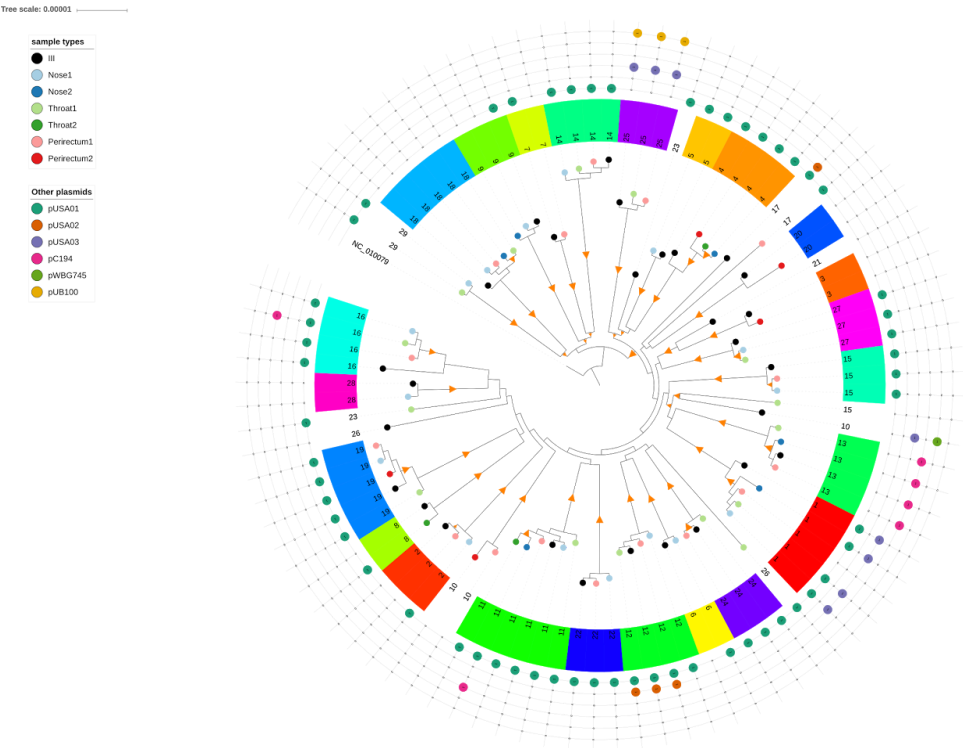

Supplementary Figure 6. Prophage distribution

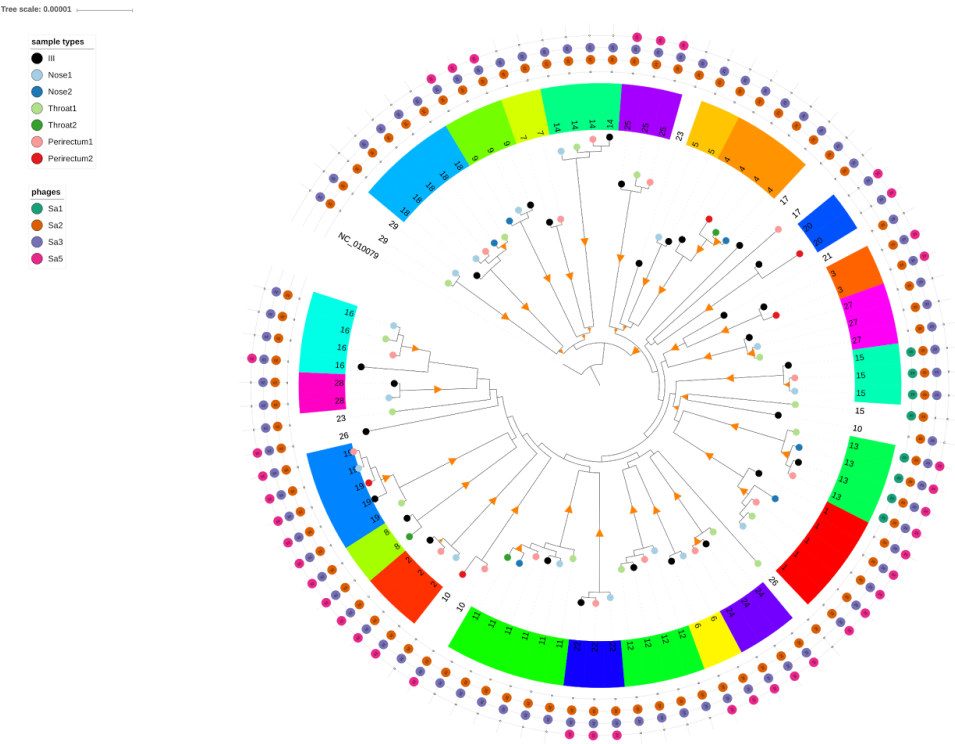

Supplement: Supplementary file [file 13754978]
